# Supplementary material for: Female resistance to pneumonia identifies lung macrophage nitric oxide synthase-3 as a therapeutic target
Source: eLife journal article supplement (doi:10.7554/elife.03711), 2014-10-15
Supplement: figures [file elife-03711-figures-v2.pdf]

---

## Figures and figure supplements

Female resistance to pneumonia identifies lung macrophage nitric oxide synthase-3 as a therapeutic target

**Zhiping Yang, et al.**

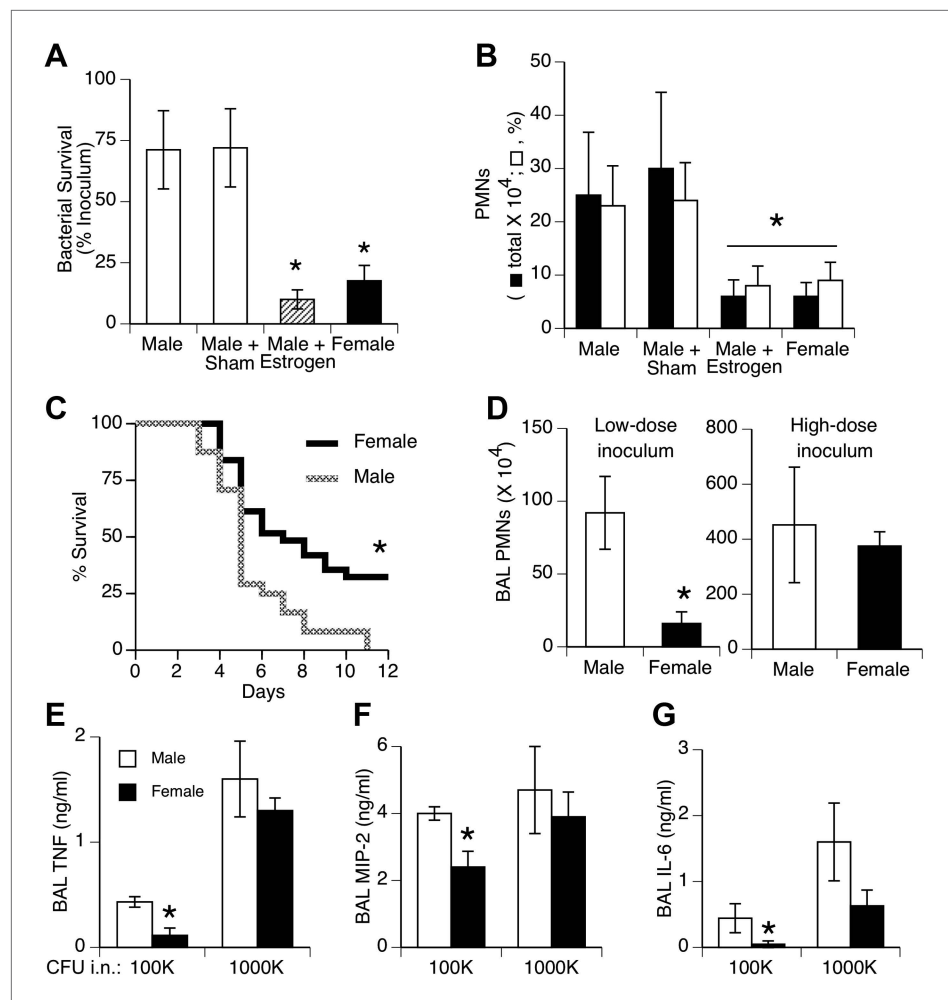

**Figure 1.** Females show greater resistance to pneumococcal pneumonia. **(A)** Twenty-four hours after intranasal (i.n.) inoculation of *S. pneumoniae* ( $\sim 10^5$  CFU), lung samples from female mice (and estrogen-treated male mice via subcutaneous slow-release 17-beta-estradiol pellets,  $\sim 70$   $\mu$ g/day) contain fewer live bacteria than seen in male mice ( $n \geq 12$ ,  $*$  =  $p < 0.01$  vs control or sham-treated males) and **(B)** show less acute inflammation (BAL neutrophils,  $n \geq 12$ ,  $*$  =  $p < 0.01$ ). **(C)** After i.n. pneumococcus, female mice show significantly greater survival than male mice ( $2.5 \times 10^5$  CFU,  $n \geq 24$ ,  $*$  =  $p < 0.01$ ). Gender differences in pneumonic inflammation are seen with low ( $4 \times 10^5$  CFU), but not high ( $11 \times 10^5$ ), bacterial inocula, measured as BAL neutrophilia **(D)** or BAL cytokines TNF **(E)**, MIP-2 **(F)**, or IL-6 **(G)**, ( $n \geq 3$ ,  $*$  =  $p < 0.05$ ).

DOI: [10.7554/eLife.03711.003](https://doi.org/10.7554/eLife.03711.003)

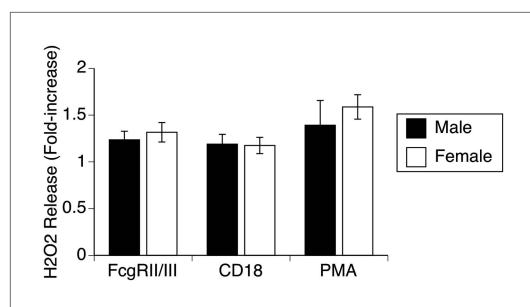

**Figure 1—figure supplement 1.** Respiratory burst by male and female alveolar macrophages. Stimulation of normal AMs by antibodies to 2 different surface receptors (FcR, CD18) or with PMA leads to approximately equal increases in  $H_2O_2$  release in both male and female AMs, indicating absence of gender differences in production of reactive oxygen species.

DOI: [10.7554/eLife.03711.004](https://doi.org/10.7554/eLife.03711.004)

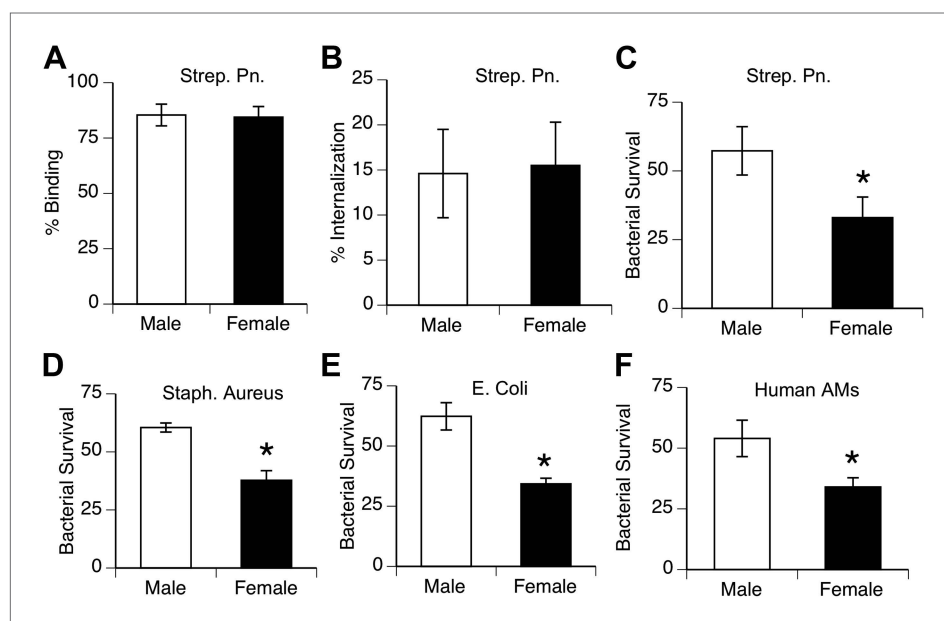

**Figure 2.** Female alveolar macrophages show better killing of ingested bacteria. Binding (A) and internalization (B) of *S. pneumoniae* in normal male and female AMs is similar. Female AMs kill more internalized bacteria than male AMs in assays using pneumococci (C) ( $n \geq 11$ ,  $* = p < 0.01$ ), *S. aureus* (D) or *E. coli* (E), ( $n \geq 3$ ,  $* = p < 0.01$ ). (F). Normal human female AMs also show greater killing of internalized pneumococci, ( $n \geq 5$ ,  $* = p < 0.01$ ).

DOI: [10.7554/eLife.03711.005](https://doi.org/10.7554/eLife.03711.005)

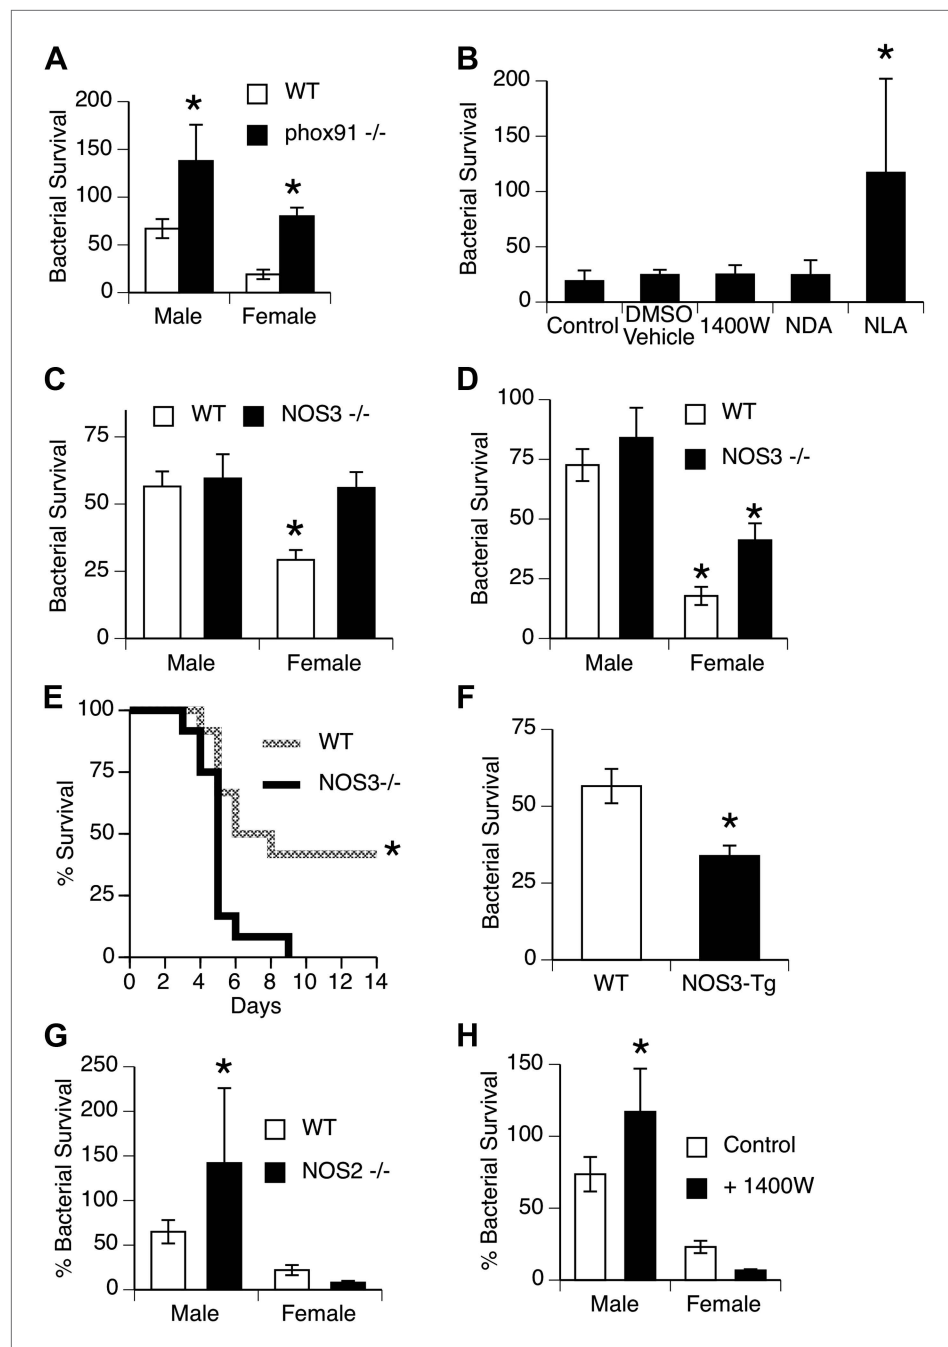

**Figure 3.** NOS3 and female resistance to pneumococcal pneumonia. (A) NADPH oxidase deficient (phox91<sup>-/-</sup>) mice show comparable reduction in bacterial clearance in both male and female mice (n = 6, \* = p < 0.01 vs wild-type). (B) In vitro killing of pneumococci by normal mouse female AMs is inhibited by the non-selective NOS inhibitor nitro-L-arginine (NLA), but not by its inactive stereo-isomer, nitro-D-arginine (NDA), nor by the type 2 NOS specific inhibitor 1400W (n = 3–4, \* = p < 0.01). (C) Female AMs from Nos3<sup>-/-</sup> mice lose the in vitro killing advantage of wild-type female AMs and show the same killing rate as wild-type or NOS3 deficient male AMs (n = 3, \* = p < 0.01 vs wild-type). (D) In vivo, absence of NOS3 reduces, but does not completely eliminate, the female advantage in bacterial clearance (n = 15, \* = p < 0.015 vs all 3 other groups) and results in increased mortality from pneumococcal pneumonia (E) (n = 12 female mice per group, \* = p < 0.01). Conversely, transgenic male mice with increased expression of human NOS3 show enhanced killing of *S. pneumoniae* in vivo (F) (lower bacterial survival, n ≥ 5, \* = p < 0.01). In this low-dose inoculum model, NOS2 deletion (G) or inhibition (H) causes reduced bacterial clearance in male, but not female mice (n = 8, \* = p < 0.05).

DOI: 10.7554/eLife.03711.006

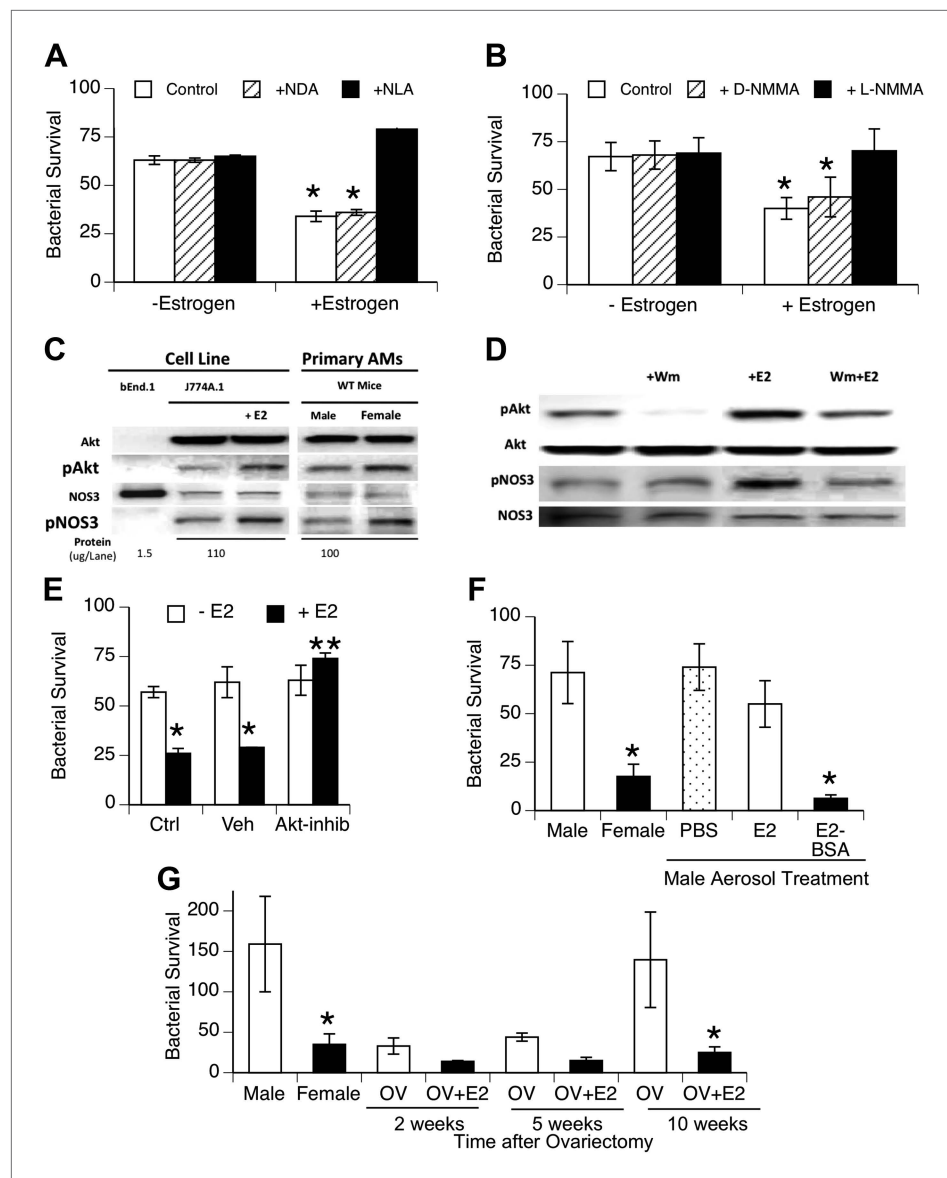

**Figure 4.** Estrogen-mediated activation of macrophage NOS3. Estrogen treatment of J774A.1 mouse or human U937 macrophages (**A** and **B**) increases killing of ingested pneumococci; this increased killing is prevented by the NOS inhibitors NLA or L-NMMA, but not control stereoisomers ( $n = 3-4$ ,  $* = p < 0.01$ ). (**C**) Western blot analysis shows >100-fold NOS3 in macrophages compared to the endothelial cell line bEnd.1; after 30 min, estrogen-treated (E2, estradiol, 0.2 ng/ml) J774A.1 mouse macrophages show increased phosphorylation of Akt and NOS 3, while normal female AMs show basally increased pAkt and pNOS3 compared to male AMs; (**D**) basal- and estrogen-enhanced phosphorylation of Akt and NOS3 are inhibited by wortmannin (Wm, 50 nM). (**E**) Inhibition of Akt with 1L-6-hydroxymethyl-chiro-inositol 2-(R)-2-O-methyl-3-O-octadecylcarbonate (10  $\mu$ g/ml REF) prevents estrogen-mediated increased bacterial killing in J774A.1 cells ( $n = 3$ ,  $* = p < 0.01$ ). (**F**) Aerosol pre-treatment of male mice with albumin-conjugated estrogen 30 min before pneumococcal infection improves bacterial killing ( $n = 6$ ,  $* = p < 0.01$ ). (**G**) In ovariectomy-model of menopause, female mice lose their greater resistance to pneumococcal pneumonia after 10 weeks, an effect reversed by treatment with estrogen prior to infection,  $n \geq 8$  for control, 10 week groups;  $n = 3$  for 2 and 5 week groups;  $* = p < 0.01$ .

DOI: 10.7554/eLife.03711.007

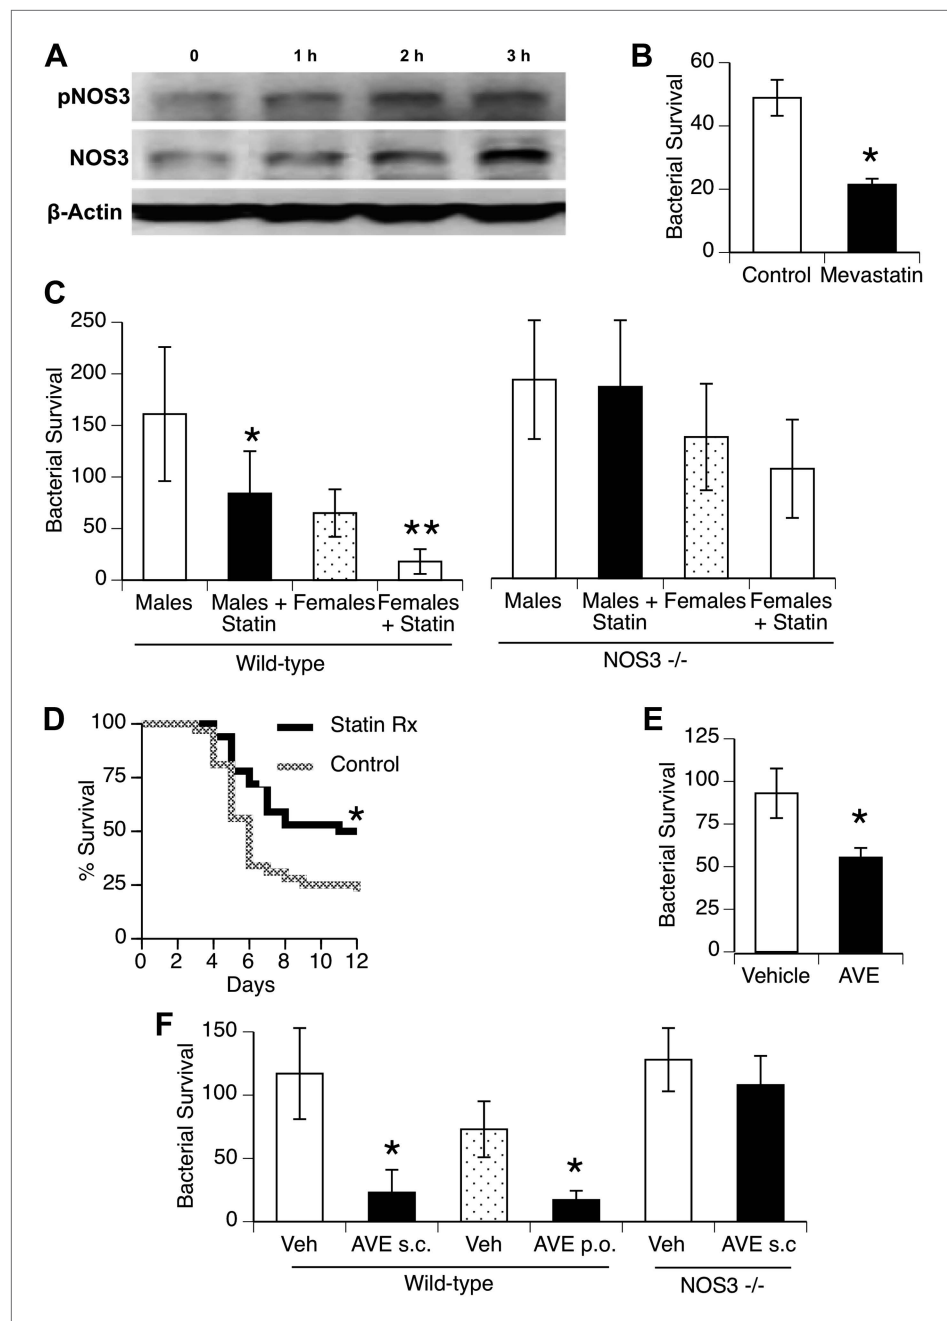

**Figure 5.** Statins enhance innate immune resistance to *S. pneumoniae* via NOS3. **(A)** In vitro treatment of J774A.1 mouse macrophages with mevastatin (5  $\mu$ M) increases levels of pNOS3 and NOS3 and **(B)** concomitantly increases killing of internalized bacteria ( $n = 4$ ,  $* = p < 0.01$ ). **(C)** In vivo, pre-treatment of mice with pravastatin (50 mg/kg) significantly improves bacterial clearance in wild-type mice ( $n = 8$ ,  $* = p < 0.01$  vs male controls;  $** = p < 0.01$  vs males, males + statin), but has no significant effect on either male or female NOS3<sup>-/-</sup> mice. **(D)** Statin-treated male mice with pneumococcal pneumonia show improved survival ( $n = 8$ ,  $* = p < 0.01$ ). **(E)** AVE3085, a small molecule activator of NOS3, increases bacterial killing by mouse macrophages in vitro ( $n = 3$ ,  $* = p < 0.01$ ) **(F)** Pre-treatment of male mice with AVE3085 by either subcutaneous or oral route improves in vivo bacterial clearance, an effect not seen in NOS3<sup>-/-</sup> male mice ( $n = 3-8$ ,  $* = p < 0.01$ ).

DOI: [10.7554/eLife.03711.010](https://doi.org/10.7554/eLife.03711.010)

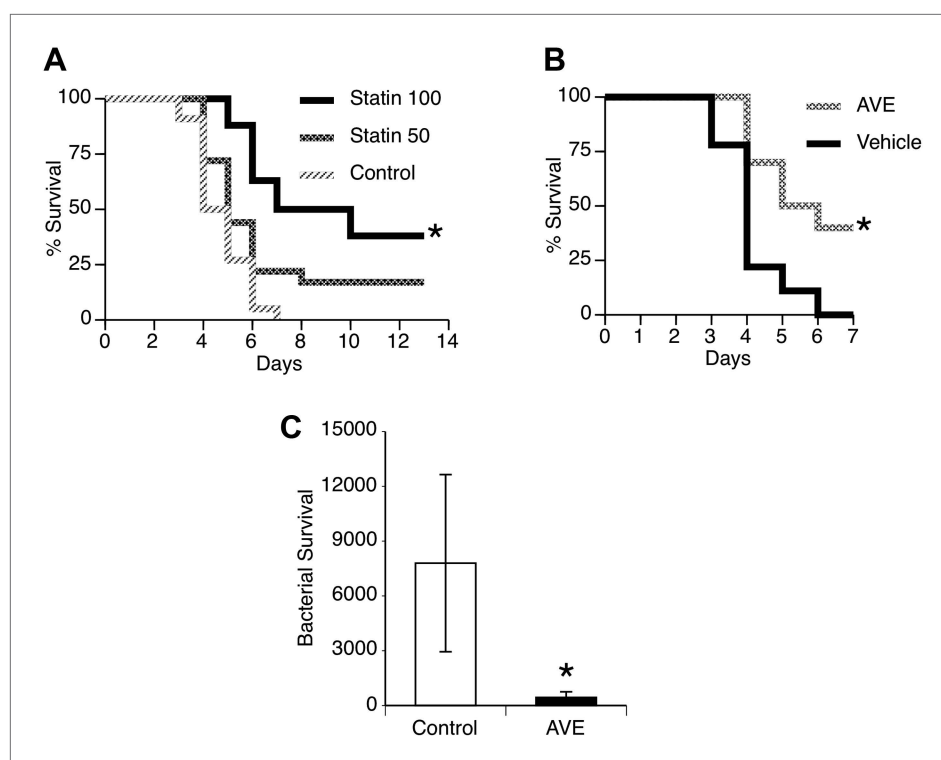

**Figure 6.** Statins and AVE3085 improve survival from post-influenza secondary pneumococcal pneumonia. Male mice were allowed to recover 7 days from mild influenza (PR8 1 PFU i.n.) and then challenged with *S. pneumoniae* (500 CFU i.n.). Pre-treatment with (A) pravastatin (50 or 100 mg/kg) or (B) AVE3085 (0.75 mg, s.c.) caused a significant improvement in survival ( $n = 10$ ,  $* = p < 0.01$ ). (C) AVE3085 treatment also lead to improved bacterial clearance 24 hr after pneumococcal challenge in this post-influenza model ( $n = 6$ ,  $* = p < 0.01$ ).

DOI: [10.7554/eLife.03711.011](https://doi.org/10.7554/eLife.03711.011)
